# Supplementary material for: Tubular porous coordination polymer for the selective sensing of Cu2+ ions and cyclohexane in mixed suspensions of metal ions via fluorescence quenching
Source: Royal Society of Chemistry journal article supplement (doi:10.1039/c5ra10336c), 2015-01-01
Supplement: c5ra10336c1.pdf [file c5ra10336c1.pdf]

## Supporting Information

### A tubular porous coordination polymer exhibiting selective sensing Cu<sup>2+</sup> ions upon mixed metal ions and small solvent molecules cyclohexane

Hai-Ning Wang, Ping-Xiao Liu, He Chen, Ning Xu, Zi-Yan Zhou\* and Shu-Ping Zhuo\*

#### Experimental Section

##### Materials and Measurements

All starting materials and solvents were reagent grade, commercially available and used without further purification. Elemental analyses (C, H and N) were performed on a Perkin-Elmer 2400 CHN elemental analyzer. TG analyses were performed on a Perkin-Elmer Thermal Analysis Pyris Diamond heated from room temperature to 900 °C under a N<sub>2</sub> atmosphere at a rate of 10 °C min<sup>-1</sup>.

**Table S1** The catalogue numbers and suppliers of the substrates

| Name                                   | CAS        | Suppliers       |
|----------------------------------------|------------|-----------------|
| Cd(NO <sub>3</sub> )·4H <sub>2</sub> O | 10325-94-7 | Energy Chemical |
| 2-H <sub>2</sub> aip                   | 10312-55-7 | Alfa Aesar      |
| 2,2'-bipyridine                        | 366-18-7   | Energy Chemical |

**Synthesis of complex 1:** A solution of Cd(NO<sub>3</sub>)·4H<sub>2</sub>O (0.105g), 2-H<sub>2</sub>aip (0.054g), 2,2'-bipyridine (0.09 g) in DMF (5 mL) was heated at 130 °C for 3 days. The resulting brown crystals were collected, washed with ethanol, and dried at room temperature. Elemental analysis for C<sub>24</sub>H<sub>27</sub>CdN<sub>5</sub>O<sub>6</sub> (593.91) (%): calcd. C 48.54 H 4.58 N 11.79; found C 48.56 H 4.56 N 11.75.

##### Luminescent measurements

The PL properties of **1** in various solvent were investigated at room temperature. The strongest emission wavelengths were located at 426 nm when excited at 350 nm. The **1**-solvent were prepared by introducing 3 mg of **1** powder into 5 mL of

acetonitrile, dichloromethane, acetic ether, DMF, isopropanol, acetone, 1, 3-propanediol, cyclohexane, tetrahydrofuran, methanol and ethanol. After sonication treatment 90 min, aging for 6 h, the fluorescence spectra were measured. For the experiment of sensing metal ions, the **1**-M<sup>x+</sup> emulsions were prepared by introducing 3 mg of **1** powder into 5 mL of M(NO<sub>3</sub>)<sub>x</sub> (M = K<sup>+</sup>, Zn<sup>2+</sup>, Cd<sup>2+</sup>, Cu<sup>2+</sup>, Ni<sup>2+</sup>, Co<sup>2+</sup> or Ag<sup>+</sup>) DMF solution. After sonication treatment 90 min, aging for 1 h, the luminescent spectra were measured. The width of the excitation slit was 2.5 nm and the emission slit was 2.5 nm.

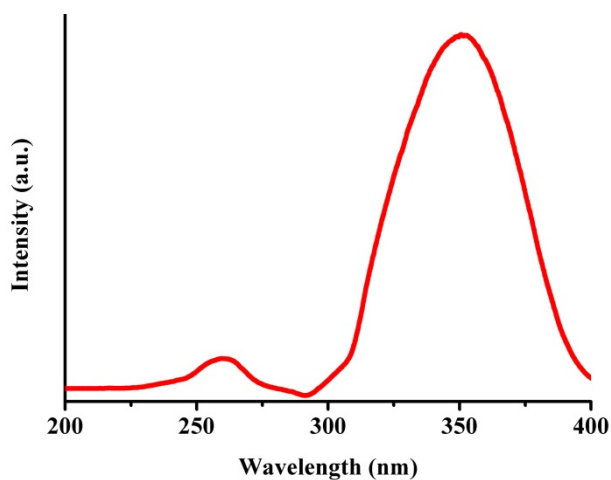

**Fig. S1** Excitation spectrum ( $\lambda_{em} = 426$  nm) of **1** in DMF.

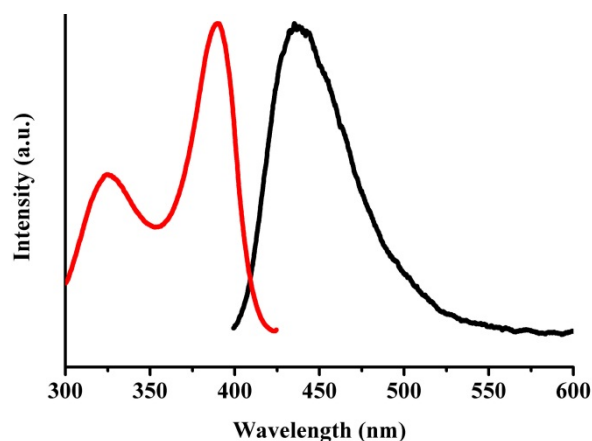

**Fig. S2** Normalized excitation (red line) and emission spectra (black line) of 2-aip in CH<sub>3</sub>OH.

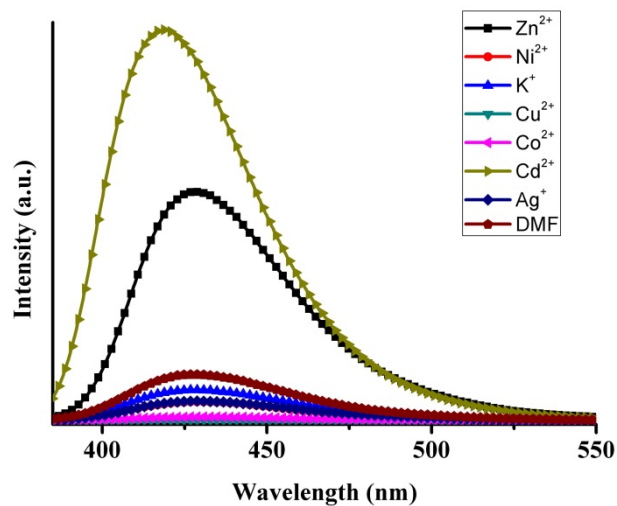

**Fig. S3** The luminescent spectra of solid **1** in DMF emulsion containing 0.01 M  $M(\text{NO}_3)_x$ .

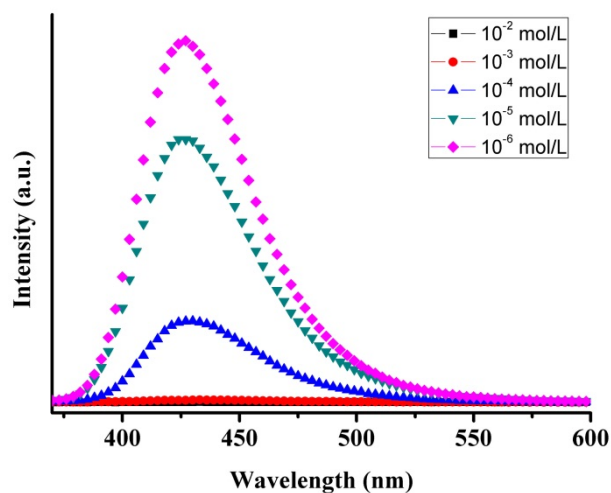

**Fig. S4** The luminescent spectra of solid **1** in  $\text{Cu}(\text{NO}_3)_2$  DMF solution at different concentrations.

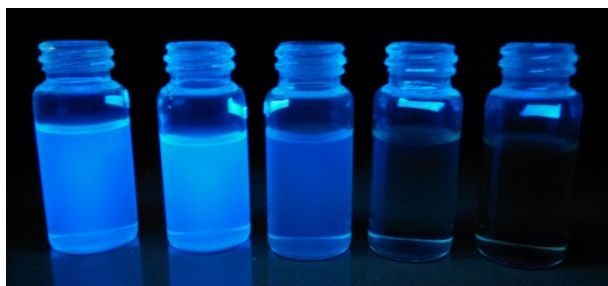

**Fig. S5** Optical images of the samples in  $\text{Cu}(\text{NO}_3)_2$  DMF solutions at different concentrations (left to right:  $10^{-6}$  mol/L,  $10^{-5}$  mol/L,  $10^{-4}$  mol/L,  $10^{-3}$  mol/L,  $10^{-2}$  mol/L) under 365 nm UV light irradiation.

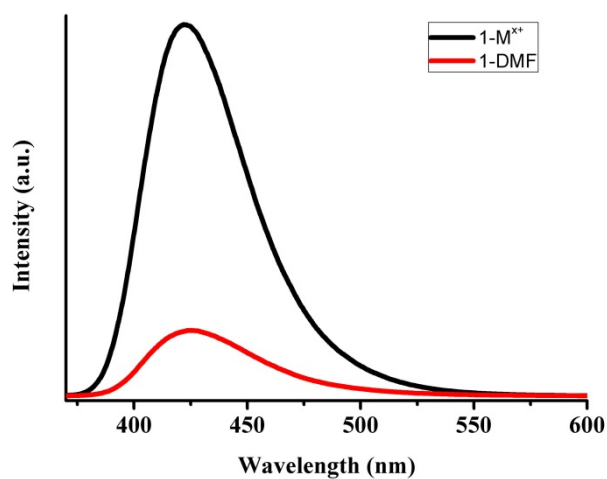

**Fig. S5** The luminescent intensities of **1** in DMF solution before and after introducing  $M^{x+}$  ions ( $M^{x+} = K^+, Cd^{2+}$  and  $Zn^{2+}$ ).

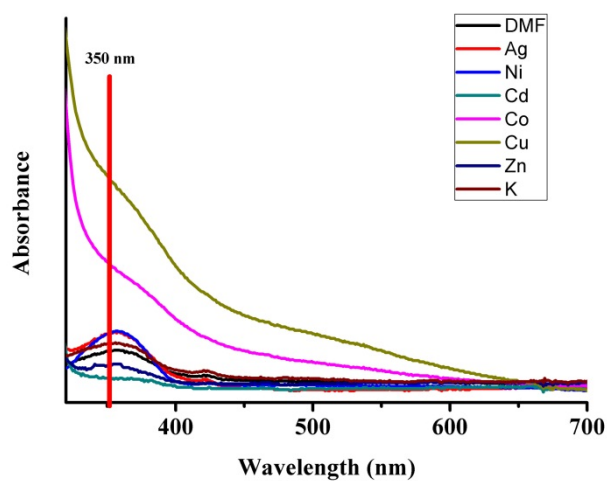

**Fig. S6** The UV-vis spectra of the **1**- $M^{x+}$  in DMF emulsions ( $M^{x+} = K^+, Ag^+, Cd^+, Co^{2+}, Ni^{2+}, Cu^{2+}$  and  $Zn^{2+}$ ).

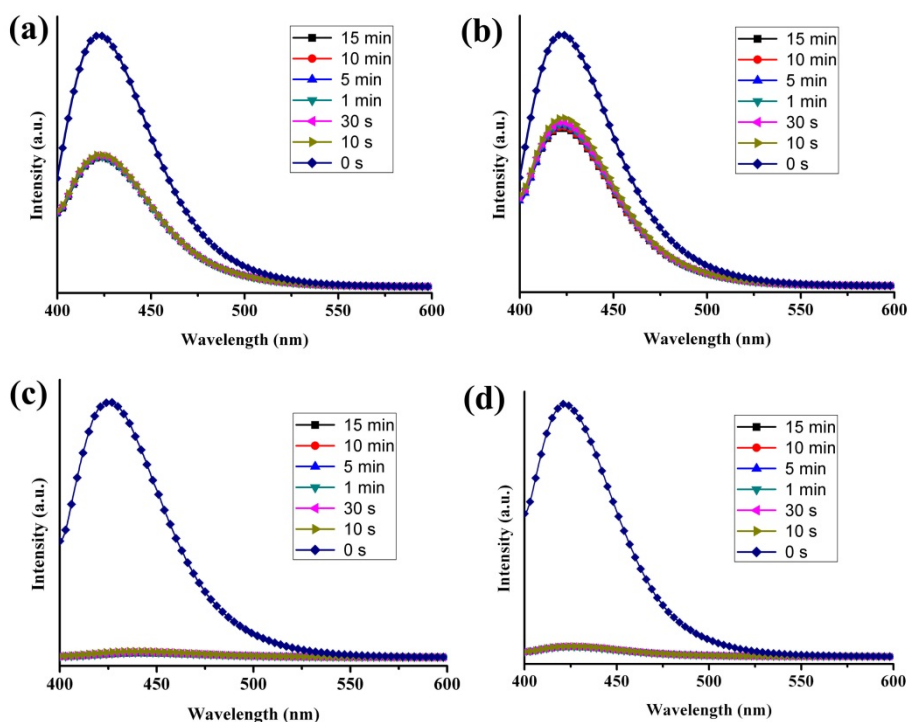

**Fig. S7** Time-dependent photoluminescence intensities of 1- $M^{x+}Ni^{2+}$  (a), 1- $M^{x+}Co^{2+}$  (b), 1- $M^{x+}Ni^{2+}Cu^{2+}$  (c) and 1- $M^{x+}Co^{2+}Cu^{2+}$  (d) ( $M^z = K^+, Cd^{2+}$  and  $Zn^{2+}$ ).

In order to check the selectivity of **1** to  $Ni^{2+}$  or  $Co^{2+}$  ions upon other metal ions ( $K^+$ ,  $Zn^{2+}$  and  $Cd^{2+}$ ), the experiments have been carried out under the same experimental conditions. When a solution (0.1 mL, containing  $5 \times 10^{-5}$  mole  $Ni^{2+}/Co^{2+}$  ions) is introduced into the solvent containing mixed metal ions, the time-dependent emission spectra of two mixed solvent were measured (Fig. 7a and 7b).  $Ni^{2+}/Co^{2+}$  ions show varying degrees of quenching. The luminescence intensities of 1- $M^{x+}Ni^{2+}$  and 1- $M^{x+}Co^{2+}$  are approximately a half and one third of that of 1- $M^{x+}$  ten seconds later. Then, the luminescence of both solvent exhibit nearly no change.

In order to evaluate the interference of  $Ni^{2+}/Co^{2+}$  ions, new experiments are carried out. The sample is immersed in an DMF solution (5 mL) containing mixed metal ions ( $5 \times 10^{-5}$  mole  $K^+$ ,  $Zn^{2+}$ ,  $Cd^{2+}$  and  $Ni^{2+}/Co^{2+}$  respectively). When a solution (0.1 mL, containing  $5 \times 10^{-5}$  mole  $Cu^{2+}$  ions) is introduced into the solvent containing mixed metal ions respectively, the solvent shows a dark colour ten seconds later under UV light, which is easy to distinguish the colour difference to the naked eye. The measurement of the emission spectrum shows the luminescence is quenched fast,

indicating the selectivity for  $\text{Cu}^{2+}$  ions is not interfered by the existence of other metal ions. Summarily, the experimental results confirm that this material features such highly selective and fast sensing of  $\text{Cu}^{2+}$  ions in dilute solution through fluorescence quenching upon mixed metal ions again.

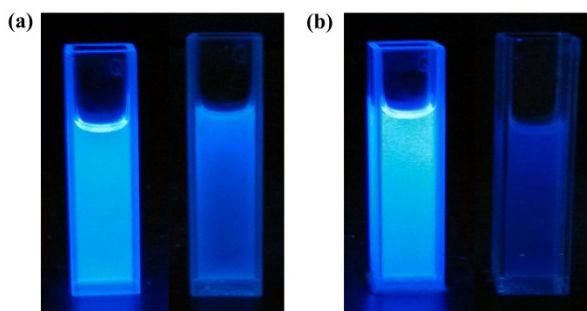

**Fig. S8** Optical images of the samples (a) (left to right:  $1\text{-M}^{x+}\text{Ni}^{2+}$  and  $1\text{-M}^{x+}\text{Ni}^{2+}\text{Cu}^{2+}$ ) and (b) (left to right:  $1\text{-M}^{x+}\text{Co}^{2+}$  and  $1\text{-M}^{x+}\text{Co}^{2+}\text{Cu}^{2+}$ ) under the irradiation of UV light of 365 nm.

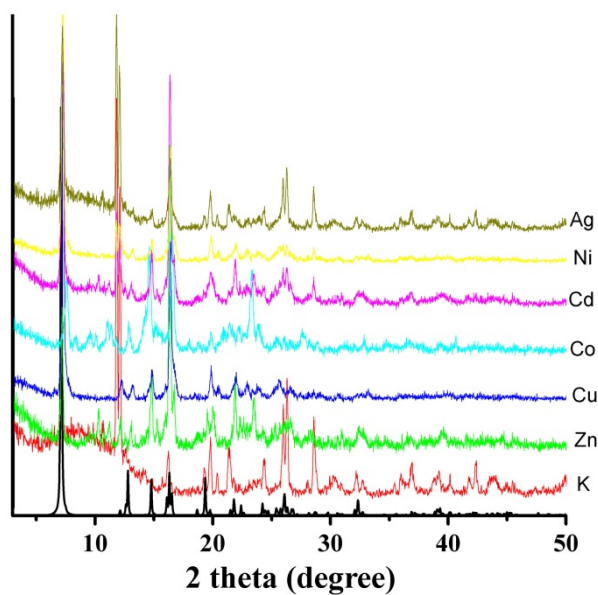

**Fig. S9** Powder X-ray diffraction patterns of simulated from the X-ray single structure of **1** and diffraction patterns obtained after the introduction of various metal ions.

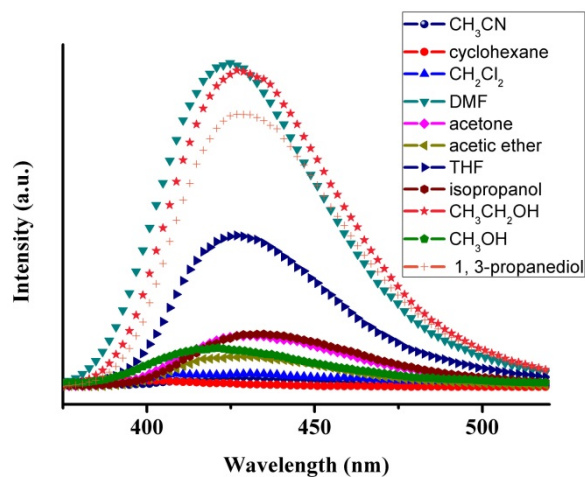

**Fig. S10** The luminescent spectra of the dispersed **1** in various solvent.

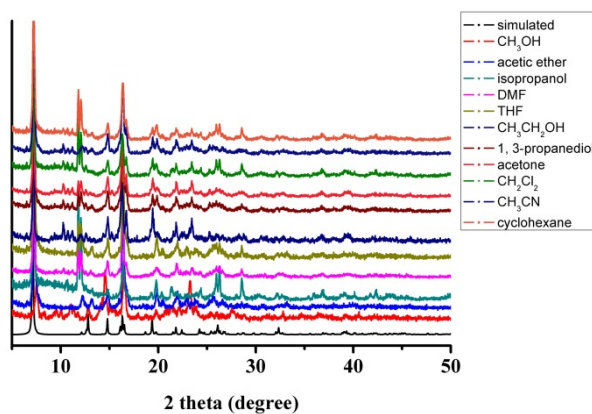

**Fig. S11** The PXRD patterns of compound **1** in various solvent.

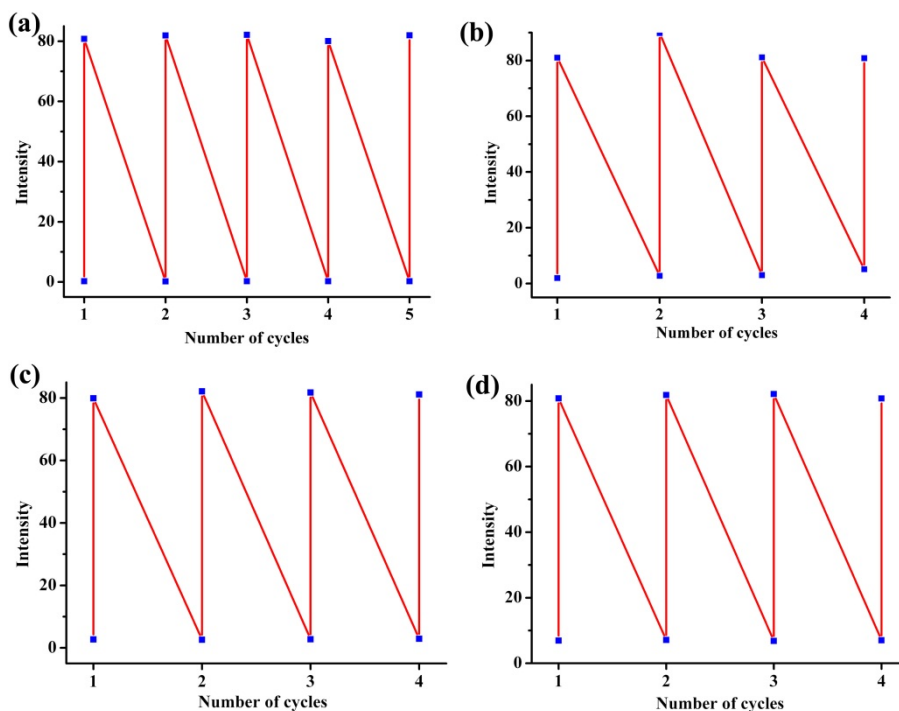

**Fig. S12** Reproducibility of the quenching ability of **1** dispersed in DMF and various solvent (cyclohexane (a),  $\text{CH}_3\text{CN}$  (b),  $\text{CH}_2\text{Cl}_2$ (c) and acetic ether (d)).

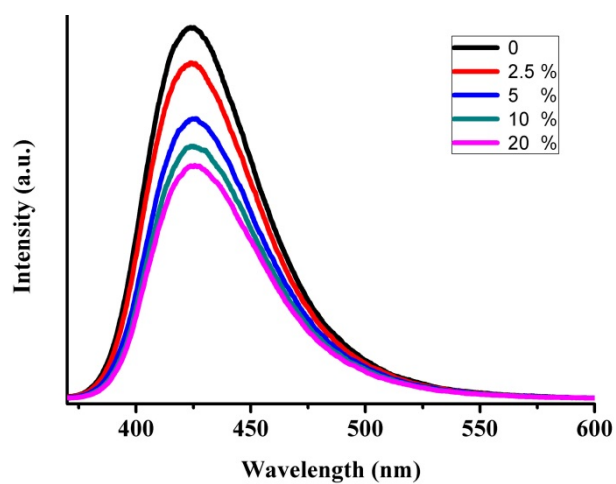

**Fig. S13** The luminescent spectra of the dispersed **1** in DMF in the presence of various contents of cyclohexane solvent (vol. %) (excited at 350 nm).

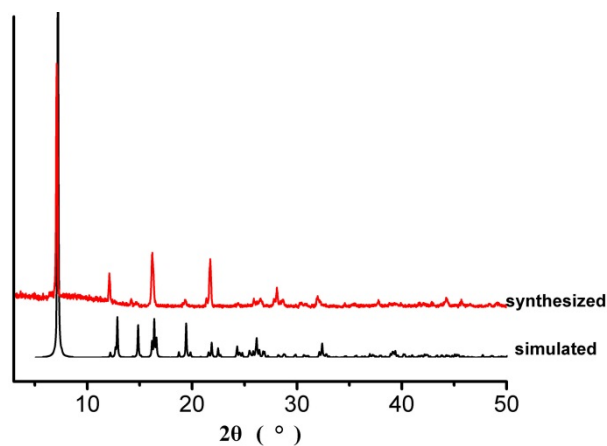

**Fig. S14** Experimental and simulated powder X-Ray diffraction patterns for **1**.

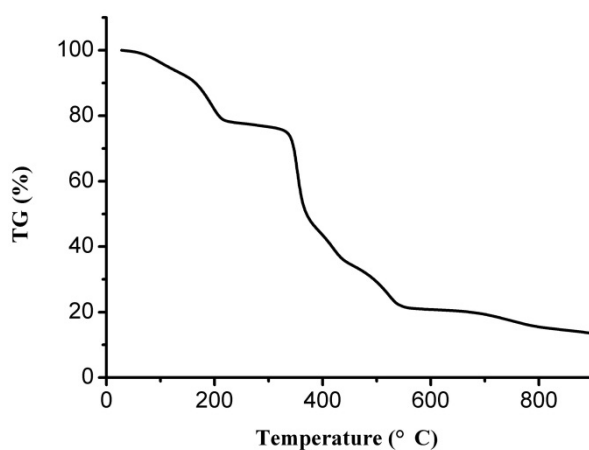

**Fig. S15** The TG profile of **1**.
